# Supplementary material for: Sequence determinants of protein phase behavior from a coarse-grained model
Source: PubMed Central journal article supplement (PMC5798848; doi:10.1371/journal.pcbi.1005941), 2018-01-24

$\varepsilon=0.10$   
 $\chi^2=77.4$

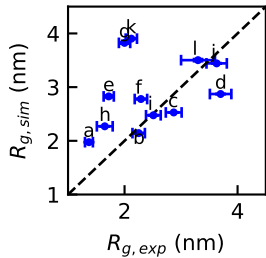

$\varepsilon=0.15$   
 $\chi^2=42.6$

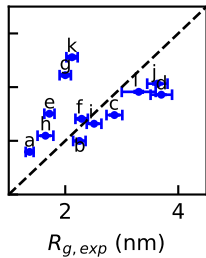

$\varepsilon=0.20$   
 $\chi^2=19.2$

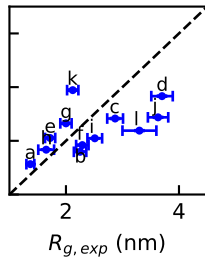

$\varepsilon=0.25$   
 $\chi^2=23.2$

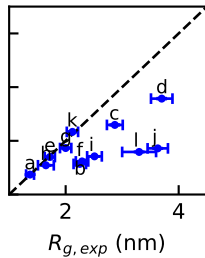

$\varepsilon=0.30$   
 $\chi^2=35.5$

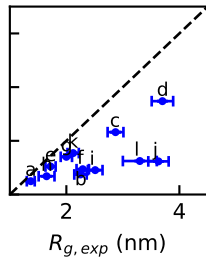

Supplement: pcbi.1005941.s001.pdf [file pcbi.1005941.s001.pdf]
