# Supplementary material for: Sequence determinants of protein phase behavior from a coarse-grained model
Source: PubMed Central journal article supplement (PMC5798848; doi:10.1371/journal.pcbi.1005941), 2018-01-24
Supplement: pcbi.1005941.s009.pdf [file pcbi.1005941.s009.pdf]

Intermolecular

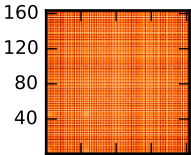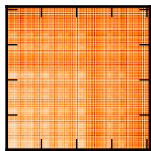

0.6  
0.5  
0.4  
0.3  
0.2  
0.1  
0.0

Contacts per frame

Intramolecular

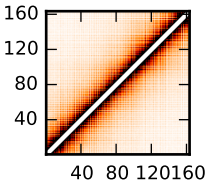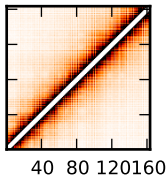

0.6  
0.5  
0.4  
0.3  
0.2  
0.1  
0.0

Contacts per frame
