# Supplementary material for: Sequence determinants of protein phase behavior from a coarse-grained model
Source: PubMed Central journal article supplement (PMC5798848; doi:10.1371/journal.pcbi.1005941), 2018-01-24

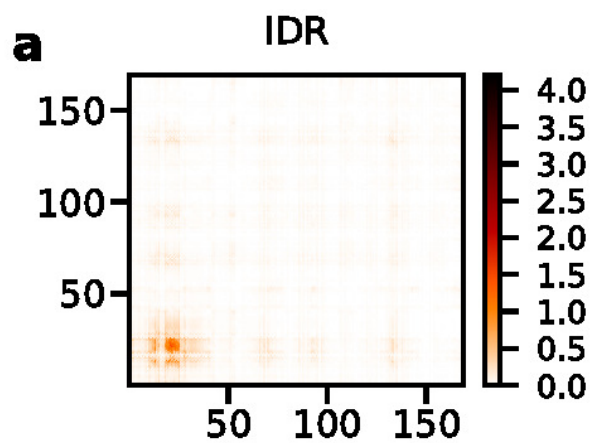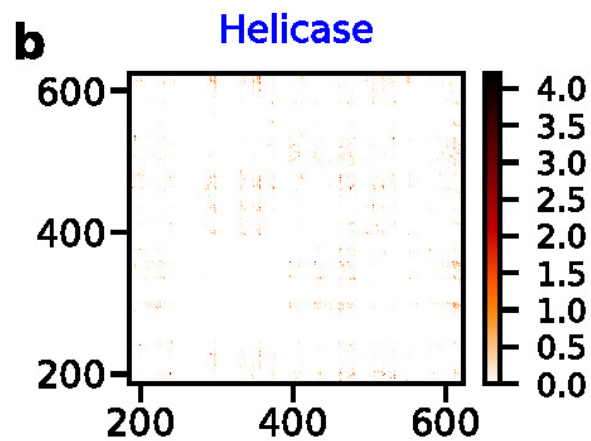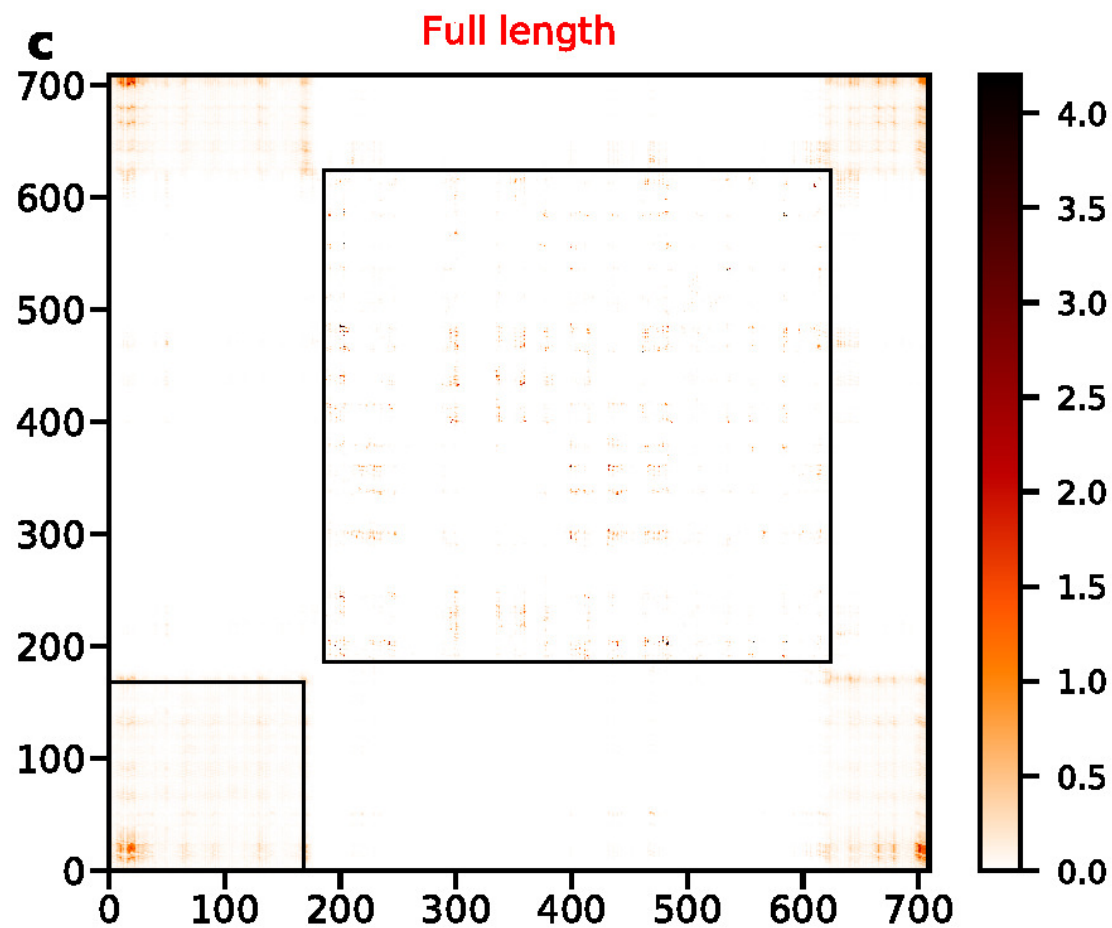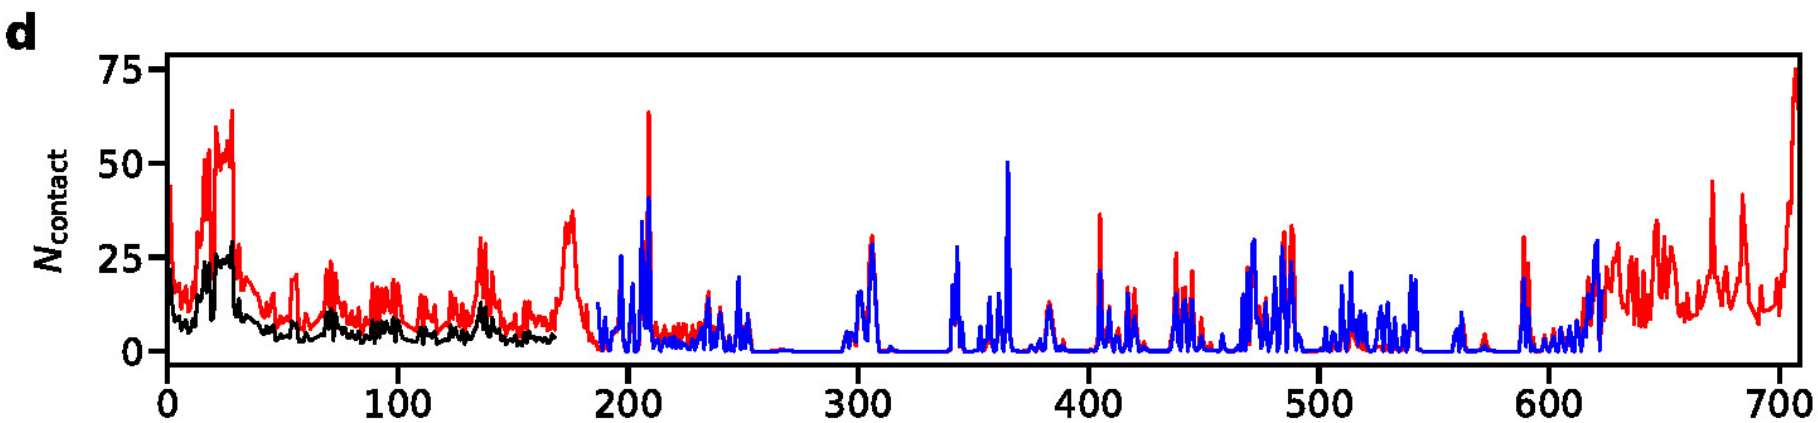

Supplement: pcbi.1005941.s016.pdf [file pcbi.1005941.s016.pdf]
