# Supplementary material for: Sequence determinants of protein phase behavior from a coarse-grained model
Source: PubMed Central journal article supplement (PMC5798848; doi:10.1371/journal.pcbi.1005941), 2018-01-24

[FUS40]<sub>1</sub>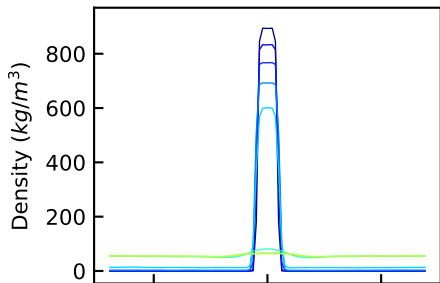[FUS40]<sub>2</sub>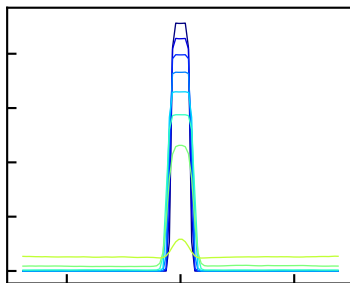[FUS40]<sub>3</sub>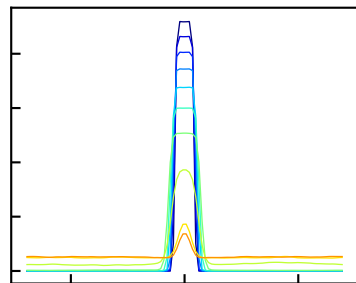[FUS40]<sub>4</sub>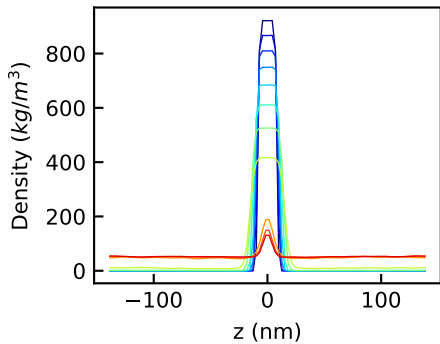[FUS40]<sub>5</sub>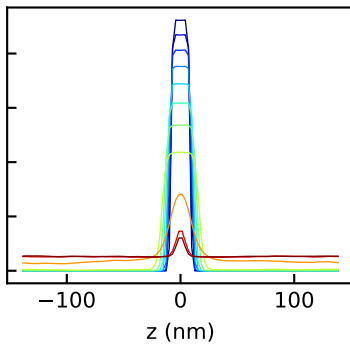
 $T/T_c, [\text{FUS40}]_1$ 
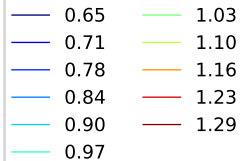

Supplement: pcbi.1005941.s018.pdf [file pcbi.1005941.s018.pdf]
